# Supplementary material for: Removal of U(vi) from aqueous solutions by an effective bio-adsorbent from walnut shell and cellulose composite-stabilized iron sulfide nanoparticles
Source: Royal Society of Chemistry journal article supplement (doi:10.1039/d1ra08087c), 2022-01-01
Supplement: d1ra08087c1.pdf [file d1ra08087c1.pdf]

1

2

## Supporting Information

3

4 Removal of U (VI) from aqueous solution by effective bio-adsorbent  
5 from walnut shell and cellulose composites stabilized iron sulfide  
6 nanoparticle

7

8 Zhengfeng Hu<sup>1,2</sup>, Huifang Wang<sup>1</sup>, Renrong Liu<sup>1</sup>, Baowei Hu<sup>1</sup>, Muqing Qiu<sup>1\*</sup>

9 1 School of Life Science, Shaoxing University, Huancheng West Road 508, Shaoxing,  
10 312000, P. R. China

11 2 Eco-Envrionmental Science & Research Institute of Zhejiang Province, Hangzhou  
12 310007, China

13 \*Corresponding Author: Muqing Qiu, [qiumuqing@usx.edu.cn](mailto:qiumuqing@usx.edu.cn)

14

15

16

17

18

19

20

21

22

23

24

25

26

27

28

29

30

31

32

33 **Preparation of biochar derived from walnut shell, FeS nanoparticles and CFeS-**  
34 **WS**

35

36 The preparation of biochar derived from walnut shell and FeS nanoparticle were  
37 synthesized by the modified method (Lyu et al. 2018). In a word, the peanut shell was  
38 rinsed with distilled water, and dried for 24 h at 110 °C. After cooling down, the dried  
39 walnut shell was ground into 1-2 cm pieces and carbonized for 2 h at 250 °C in a  
40 muffle furnace under oxygen-limited conditions. Then biochar was pulverized and  
41 sieved through a 60 meshes sieve. The biochar derived from walnut shell was gained.

42 The iron sulfide nanoparticles (FeS) were prepared according to the reaction of FeSO<sub>4</sub>  
43 with Na<sub>2</sub>S. That is, 50 mL FeSO<sub>4</sub> solution (0.05 mol/L) was added into 250 mL  
44 Erlenmeyer flask. Then, 50 mL Na<sub>2</sub>S solution (0.05 mol/L) was also added and mixed  
45 for 30 min under continuous aerating N<sub>2</sub> and magnetic stirring condition. Then  
46 suspensions were sealed with rubber stopper and aged for 48 h. It could ensure the full  
47 growth of iron sulfide nanoparticles. Finally, the iron sulfide nanoparticles were  
48 obtained for experiments.

49 CFeS-WS was prepared with the composites of biochar, cellulose and FeS  
50 nanoparticles. According to the previous experimental results, it can be found that the  
51 mass ratio of ferrous sulfate, Na<sub>2</sub>S, cellulose and biochar is 2:2:1:4, which is optimum  
52 value. That is, under the magnetic stirring condition and continuous aerating nitrogen,  
53 the 5 g FeSO<sub>4</sub> and 100 mL of anaerobic deionized water were mixed into the 250 mL  
54 Erlenmeyer flask. Then, added 10 g biochar from walnut shell to the Erlenmeyer flask  
55 and stirred them for 30 min under magnetic stirring condition. Next, added 2.5 g  
56 cellulose into the Erlenmeyer flask again, and stirred them for 30 min under magnetic  
57 stirring condition. Then, 5 g Na<sub>2</sub>S was added into the mixture solution, which was  
58 stirred them for 30 min under magnetic stirring condition. In the process of  
59 preparation, they were conducted under magnetic stirring condition and continuous  
60 aerating nitrogen in order to avoid oxidation of Fe<sup>2+</sup> ions in solution. Then, the  
61 mixture solution was sealed with rubber stopper, which was placed in a constant

62 temperature of 25°C for 48 h. Then, they were freeze-dried for 12 h, which were  
63 washed with anaerobic deionized water for three times. Subsequently, they were  
64 freeze-dried for 12 h again. The efficient bio-adsorbent of CFeS-WS was obtained.  
65 The obtained materials (biochar, FeS nanoparticle, FeS-WS and CFeS-WS were  
66 prepared for tests.

67

### 68 **Calculation of the removal rate and uptake capacity**

69 The Eq.1-2 was used for the calculation of the removal rate ( $R$  (%)) and uptake  
70 capacity ( $q$  (mg/g)).

$$71 \quad R = \frac{C_0 - C_e}{C_0} \times 100\% \quad (1)$$

$$72 \quad q = \frac{(C_0 - C_e) \times V}{m} \quad (2)$$

73 Where,  $V$  (L) and  $m$  (g) were the solution volume and the weight of adsorbent,  
74 respectively.  $C_e$  (mg/L) and  $C_0$  (mg/L) were equilibrium concentration and initial  
75 concentration, respectively.

76

### 77 **Pseudo first-order kinetic model and Pseudo second-order kinetic model**

78 Their mathematical expressions of pseudo first-order kinetic model and pseudo  
79 second-order kinetic model were shown as Eq.3-4 (Hummers & Offeman 1958,  
80 Lagergren 1898).

$$81 \quad q_t = q_e (1 - e^{-K_1 t}) \quad (3)$$

$$82 \quad \frac{t}{q_t} = \frac{1}{K_2 q_e^2} + \frac{t}{q_e} \quad (4)$$

83 Where  $q_e$  (mg/g) and  $q_t$  (mg/g) are adsorption capacity of U(VI) ions solution by  
84 CFeS-WS at adsorption time  $t$  and adsorption equilibrium respectively.  $K_1$  ( $\text{min}^{-1}$ )

85 and  $K_2$  ( $\text{min}^{-1}$ ) are the adsorption rate constant.

86

### 87 **Langmuir isotherm model and Freundlich isotherm model**

88 Their mathematical expressions of Langmuir isotherm model and Freundlich isotherm  
89 model were displayed as Eq.5-6 (Langmuir 1918, Freundlich 1906).

$$90 \quad q_e = \frac{q_m C_e K_L}{1 + C_e K_L} \quad (5)$$

91 Where  $q_e$  (mg/g) was concentration of adsorbed U(VI) ions at equilibrium.  $q_m$  (mg/g)  
92 was the maximum uptake capacity of U(VI) ions.  $C_e$  (mg/L) was concentration of  
93 U(VI) ion at equilibrium and  $K_L$  (L/mg) was constant.

$$94 \quad q_e = K_f C_e^{1/n} \quad (6)$$

95 Where  $q_e$  (mg/g) was the amount of adsorbed U(VI) ions per unit mass of the  
96 adsorbent at equilibrium.  $C_e$  (mg/L) was concentration of U(VI) ion at equilibrium.  
97  $K_f$  and  $1/n$  were constant.

98

### 99 **Calculation of thermodynamic parameters**

100 They are Gibbs free energy ( $\Delta G^0$  (kJ/mol)), enthalpy ( $\Delta H^0$  (kJ/mol)) and entropy ( $\Delta S^0$  (J/mol/K)) respectively. They can be calculated using the following Eq.7-9:

$$102 \quad \Delta G^0 = -RT \ln K_a \quad (7)$$

$$103 \quad \ln K_a = \frac{\Delta S^0}{R} - \frac{\Delta H^0}{RT} \quad (8)$$

$$104 \quad K_a = \frac{q_e}{C_e} \quad (9)$$

105 Where,  $T$  was the solution temperature (K), and  $K_a$  was the adsorption equilibrium  
106 constant. The value of  $R$  was the gas constant (8.314 J·mol<sup>-1</sup>·K<sup>-1</sup>), and  $q_e$  was the  
107 amount of adsorbate adsorbed per unit mass of adsorbate at equilibrium (mg/g). The

108 value of  $C_e$  is the equilibrium concentration of the adsorbate (mg/L).

109

110 **The species distribution of U(VI) ions at different pH**

111

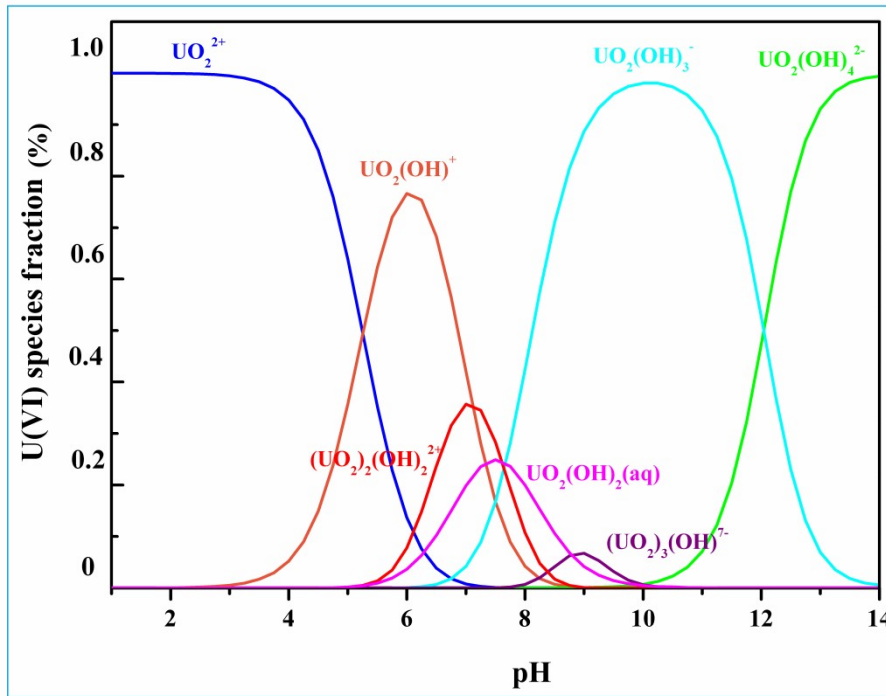

112

113 Fig.9 The species distribution of U(VI) ions using Visual MINTEQ (Version 3.0).

114

115

116

117 Table 1 Comparison of CFeS-WS with other adsorbents for U(VI) removal

| Adsorbents            | Experimental conditions | $q_e$ (mg/g) | Refs                 |
|-----------------------|-------------------------|--------------|----------------------|
| active carbon         | pH=3.0, T=293K          | 28.3         | (Pang et al. 2018)   |
| magnetic biochar      | pH=3.0, T=293K          | 54.4         | (Hu et al. 2018)     |
| nZVI/C composite      | pH=3.0, T=298K          | 103.1        | (Liu et al. 2017)    |
| MnO <sub>2</sub> @PPy | pH=5.0, T=298K          | 63.0         | (Mellah et al. 2006) |
| FA@PEI                | pH=5.0, T=298K          | 70.32        | (Yao et al. 2018)    |
| CFeS-WS               | pH=6.0, T=318 K         | 136.24       | <b>This work</b>     |

118

119

120 Reference

121 Freundlich, H.M.F. 1906. Über die adsorption in lasungen. J. Phys. Chem., 57: 385-  
122 470.

123 Hu, Q., Zhu, Y., Hu, B., Lu, S., Sheng, G. 2018. Mechanistic insights into  
124 sequestration of U(VI) toward magnetic biochar: Batch, XPS and EXAFS  
125 techniques, J. Environ. Sci., 70: 217-225.

126 Hummers, W.S. and Offeman, R.E. 1958. Preparation of graphitic oxide. J. Am.  
127 Chem. Soc., 80: 1339-1339.

128 Lagergren, S. 1898. Zur theorie der sogenannten adsorption gelöster stoffe. Pseudo-  
129 second order model for sorption processes. Handlingar, 24:1-39.

130 Langmuir, I. 1918. The adsorption of gases on plane surface of glass, mica and  
131 platinum. J. Am. Chem. Soc., 40: 1361-1403.

132 Liu, H., Li, M., Chen, T., Chen, C., Alharb, N., Hayat, T., Chen, D., Zhang, Q., Sun,  
133 Y. 2017. New Synthesis of nZVI/C Composites as an Efficient Adsorbent for the  
134 Uptake of U(VI) from Aqueous Solutions, Environ. Sci. Technol., 51: 9227-9234.

135 Lyu, H.H., Zhao, H., Tang, J.C., Gong, Y.Y., Huang, Y., Wu, Q.H., Gao, B.,  
136 Immobilization of hexavalent chromium in contaminated soils using biochar  
137 supported nanoscale iron sulfide composite, Chemosphere, 2018, 194, 360-369.

138 Mellah, A., Chegrouche, S., Barkat, M. 2006. The removal of uranium(VI) from  
139 aqueous solutions onto activated carbon: kinetic and thermodynamic investigations,  
140 J. Colloid Interf. Sci., 296: 434-441.

141 Pang, H., Huang, S., Wu, Y., Yang, D., Wang, X., Yu, S., Chen, Z., Alsaedi, A.,  
142 Hayat, T., Wang, X. 2018. Efficient elimination of U(VI) by polyethyleneimine-

143 decorated fly ash, *Inorg. Chem. Front.*, 5: 2399-2407.

144 Yao, W., Wu, Y., Pang, H., Wang, X., Yu, S., Wang, X. 2018. In-situ reduction

145 synthesis of manganese dioxide@polypyrrole core/shell nanomaterial for highly

146 efficient enrichment of U(VI) and Eu(III), *Sci. China Chem.*, 61: 812-823.

147
